# Supplementary material
Source: PubMed Central journal article supplement (PMC1895961)
Supplement: pnas_0608218104_9.pdf [file pnas_0608218104_9.pdf]

**Table 4.** Percentages of loci in different retention classes between *S. cerevisiae* and the real *K. polysporus* genome, and in 100 pseudo-genomes where the tracking of *K. polysporus* single-copy genes was randomized.

| Locus class<br>( <i>K. pol.</i> : <i>S. cer.</i> ) | Real genome    |         | Pseudo-genomes |       |         |       |
|----------------------------------------------------|----------------|---------|----------------|-------|---------|-------|
|                                                    | Number of loci | Percent | Number of loci |       | Percent |       |
|                                                    |                |         | Mean           | S.D.  | Mean    | S.D.  |
| 2:2                                                | 212            | 6.52%   | 209.17         | 1.81  | 7.60%   | 0.87% |
| 2:1                                                | 238            | 7.32%   | 234.90         | 1.65  | 8.53%   | 0.70% |
| 1:2                                                | 221            | 6.80%   | 183.27         | 5.00  | 6.66%   | 2.73% |
| 1:1 orthologs                                      | 1455           | 44.74%  | 1195.72        | 26.65 | 43.42%  | 2.23% |
| 1:1 paralogs                                       | 1126           | 34.62%  | 930.61         | 24.61 | 33.80%  | 2.64% |
| Total                                              | 3252           |         | 2753.67        |       |         |       |
| Proportion of paralogs among 1:1 loci              |                | 44%     |                |       | 44%     | 1%    |
